# Supplementary material
Source: PubMed Central journal article supplement (PMC9391496)
Supplement: 42003_2022_3797_MOESM2_ESM.pdf [file 42003_2022_3797_MOESM2_ESM.pdf]

# Predicting the potential for zoonotic transmission and host associations for novel viruses

## Authors:

P. S. Pandit<sup>1\*</sup>, S.J. Anthony<sup>2\*\*</sup>, T. Goldstein<sup>1\*\*</sup>, K. J. Olival<sup>3</sup>, M. M. Doyle<sup>1</sup>, N. R. Gardner<sup>1</sup>, B. Bird<sup>1</sup>, W. Smith<sup>1</sup>, D. Wolking<sup>1</sup>, K. Gilardi<sup>1</sup>, C. Monagin<sup>1</sup>, T. Kelly<sup>1</sup>, M. Uhart<sup>1</sup>, J. H. Epstein<sup>3</sup>, C. Machalaba<sup>3</sup>, M. K. Rostal<sup>3</sup>, P. Dawson<sup>3</sup>, E. Hagan<sup>3</sup>, A. Sullivan<sup>3</sup>, H. Li<sup>3</sup>, A. A. Chmura<sup>3</sup>, A. Latinne<sup>3</sup>, C. Lange<sup>4</sup>, T. O'Rourke<sup>4</sup>, S. Olson<sup>5</sup>, L. Keatts<sup>1</sup>, P. Mendoza<sup>5</sup>, A. Perez<sup>5</sup>, C. Dejuste de Paula<sup>5</sup>, D. Zimmerman<sup>6</sup>, M. Valitutto<sup>6</sup>, M. LeBreton<sup>7</sup>, D. McIver<sup>8</sup>, A. Islam<sup>3</sup>, V. Duong<sup>9</sup>, M. Mouiche<sup>7</sup>, Z. Shi<sup>10</sup>, P. Mulembakani<sup>11</sup>, C. Kumakamba<sup>12</sup>, M. Ali<sup>13</sup>, N. Kebede<sup>14</sup>, U. Tamoufe<sup>15</sup>, S. Bel-Nono<sup>16</sup>, A. Camara<sup>17</sup>, J. Pamungkas<sup>18,19</sup>, K. Coulibaly<sup>20</sup>, E. Abu-Basha<sup>21</sup>, J. Kamau<sup>22</sup>, S. Silithammavong<sup>8</sup>, J. Desmond<sup>3</sup>, T. Hughes<sup>3,23</sup>, E. Shiilegdamba<sup>24</sup>, O. Aung<sup>6</sup>, D. Karmacharya<sup>25</sup>, J. Nziza<sup>26</sup>, D. Ndiaye<sup>27</sup>, A. Gbakima<sup>28</sup>, Z. Sijali<sup>29</sup>, S. Wacharapluesadee<sup>30</sup>, E. Alandia Robles<sup>31</sup>, B. Ssebide<sup>26</sup>, G. Suzán<sup>32</sup>, L. F. Aguirre<sup>33</sup>, M. R. Solorio<sup>34</sup>, T. N. Dhole<sup>35</sup>, N. T. T. Nga<sup>36</sup>, P. L. Hitchens<sup>37</sup>, D. O. Joly<sup>38</sup>, K. Saylor<sup>4</sup>, A. Fine<sup>5</sup>, S. Murray<sup>7</sup>, W. Karesh<sup>3</sup>, P. Daszak<sup>3</sup>, J. A. K. Mazet<sup>1</sup>, PREDICT Consortium, & C. K. Johnson<sup>1\*</sup>

\*Corresponding author: P.S. Pandit, [pspandit@ucdavis.edu](mailto:pspandit@ucdavis.edu) and C. K. Johnson, [ckjohnson@ucdavis.edu](mailto:ckjohnson@ucdavis.edu)

## Description of Additional Supplementary Files

### File name: Supplementary Data 1

Description: Species target list for novel viruses based on known hosts of virus to which novel viruses are predicted to generate links in the predicted network ( $G_{predicted}$ )

### File name: Supplementary Data 2

Description: Data listing novel viruses from wildlife and their wildlife host. Data also describes the prioritized surveillance target wildlife hosts as predicted by network prediction models.

### File name: Supplementary Data 3

Description: Data file listing available GenBank accession numbers for novel PREDICT viruses used in the study to generate network predictions.

### File name: Supplementary Data 4

Description: FASTA file with nucleotide sequences for novel PREDICT viruses used in the study to generate network predictions for which GenBank accession numbers are not available currently.
